# Supplementary material for: Machine learning of stability scores from kinetic data
Source: Royal Society of Chemistry journal article supplement (doi:10.1039/d4dd00036f), 2024-01-01
Supplement: d4dd00036f1.pdf [file d4dd00036f1.pdf]

# Supporting Information: Machine Learning of Stability Scores from Kinetic Data

Veerupaksh Singla, Qiyuan Zhao, and Brett M. Savoie\*

*Davidson School of Chemical Engineering, Purdue University, West Lafayette, IN, 47906*

E-mail: bsavoie@purdue.edu

## 1 Detailed Methods

### 2 1.1 Reaction rate parameters

3 The rate constants for the barrierless radical recombination reactions were obtained through  
4 the collision theory based group additivity rules implemented in Reaction Mechanism Genera-  
5 tor (RMG).<sup>1,2</sup> For the other four reaction types, the rate constants ( $k$ ) were calculated based  
6 on the transition state theory (TST). Specifically, the Eyring equation with the shallow Wigner  
7 tunneling correction was utilized (Eq. 1).<sup>3</sup>

$$k = \kappa \frac{k_B T}{h} \left( \frac{RT}{P} \right)^{m-1} e^{\frac{-\Delta G^\ddagger}{RT}} \quad (1)$$

8 The tunneling correction term,  $\kappa$ , was calculated using Eq. 2<sup>4</sup> for proton-transfer reactions such as  
9 hydrogen abstraction and isomerization, whereas for initiation and radical decomposition reactions,



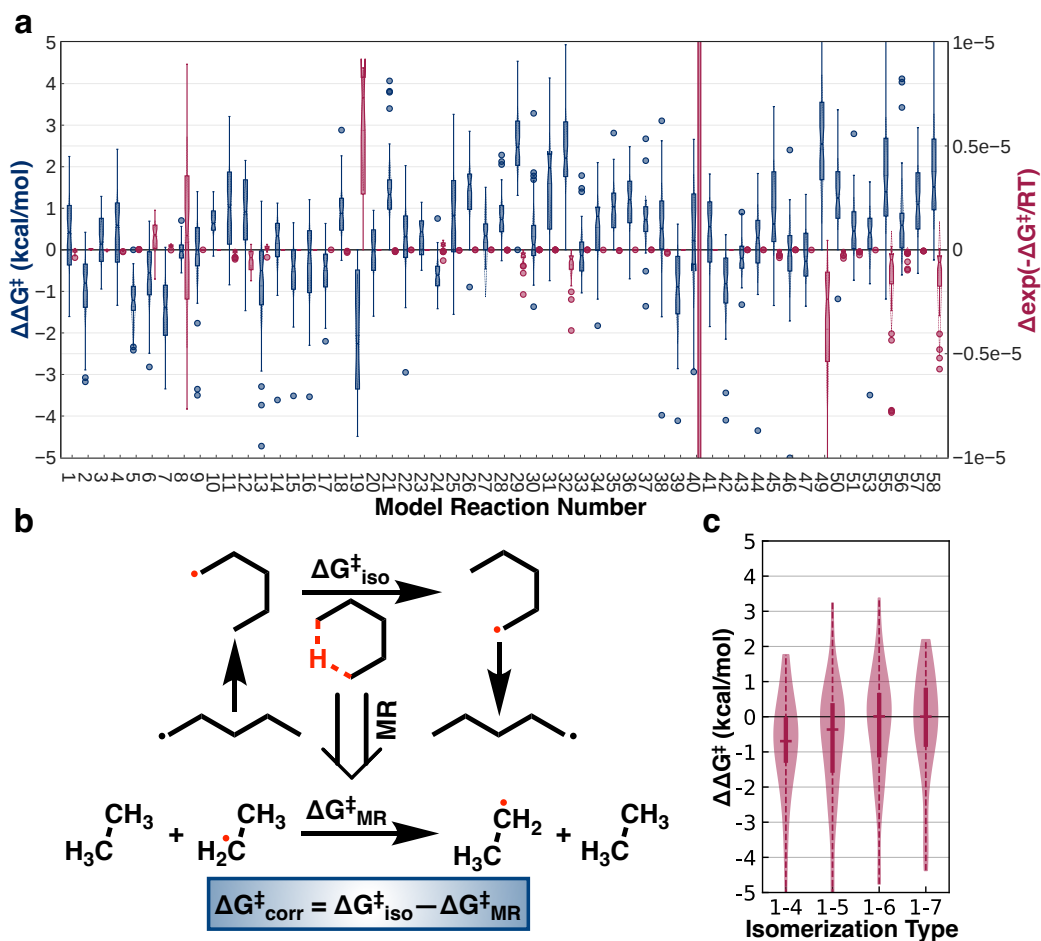

Figure S2: Model reaction benchmarking and correction for isomerization reactions. (a) Signed deviations in free energy of activation (left y-axis), and exponential term variation (right y-axis) of model reactions with respect to the benchmarking reactions. The solid boxes span from the first ( $q_1$ ) to the third ( $q_3$ ) quartile with the second quartile ( $q_2$ /median) represented by the solid line and notch in the box. The whiskers range from  $q_1 - 1.5iqr$  to  $q_3 + 1.5iqr$  where  $iqr$  refers to the interquartile range ( $q_3 - q_1$ ). The dashed lines represent the mean and the standard deviation. (b) Generating correction factors for isomerization reactions from the corresponding model reaction. (c) Signed deviations in corrected free energy of activation of isomerization reactions with respect to the benchmarking reactions. The violin plots span from the minimum to the maximum value, bold vertical lines span from the first to the third quartile, and the bold horizontal tick is the median.

10 it was set to 1.

$$\kappa = 1 + \frac{1}{24} \left( \frac{h\omega^\ddagger}{k_B T} \right)^2 \quad (2)$$

11 In Eqs. 1- 2,  $k_B$  is the Boltzmann constant,  $h$  is Planck’s constant,  $T$  is the operating tem-  
12 perature (i.e. 700 K),  $R$  is the ideal gas constant,  $P$  is the operating pressure (i.e., 1.01325 bar),  
13  $m$  is the molecularity (i.e. the number of reactants) of the reaction,  $\Delta G^\ddagger$  is the Gibbs energy of  
14 activation, and  $\omega^\ddagger$  is the imaginary frequency of the transition state.

15 Since initiation reactions are inverse radical recombination reactions, their Gibbs energies of  
16 activation were estimated by the corresponding bond dissociation free energies (BDFE), predicting  
17 by ALFABET.<sup>5</sup> For the remaining three reaction types, i.e., hydrogen abstraction, isomerization,  
18 and radical decomposition,  $\Delta G^\ddagger$  was estimated by a model reaction based approach (Fig. 1a.ii),  
19 to manage the exponential growth in the number of reactions as the alkane length increases.

20 Model reactions were defined based on the uniqueness of the reaction centers (i.e., the atoms  
21 involved in a bond break or formation during the reaction) and their bonded neighbors. The  
22 smallest representative of each reaction was used to calculate  $\Delta G^\ddagger$  from a transition state search  
23 (described next) and this value was used as an estimate for all reactions in that class as defined  
24 by the reaction centers and bonded neighbors. The smallest representative reactions for each class  
25 were generated by hydrogenating the under-coordinated bonded neighbors of the reaction centers  
26 to a degree that maintained the reaction center hybridization. An illustration of the approach is  
27 shown in Fig. 1a.ii in the main text.

28 Generating model reactions for all possible hydrogen abstraction, isomerization, and radical  
29 decomposition reactions associated with arbitrary alkane pyrolysis resulted in a fixed set of 59  
30 model reactions (Fig. S1) that were characterized with the YARP v2.0 package.<sup>6</sup> Using YARP  
31 v2.0 on the model reaction geometries, double-ended transition state searches were performed to  
32 generate initial transition state geometry guesses that were then refined at the DFT level.<sup>7</sup> Up

33 to four independent double-ended searches were performed using distinct reactant and product  
34 conformers generated by YARP to promote the discovery of the lowest barrier transition states.<sup>8</sup>  
35 The reactant, product, and transition state geometries were optimized at the  $\omega$ B97X-D/def2-  
36 TZVP<sup>9,10</sup> level of theory and the lowest  $\Delta G^\ddagger$  amongst the discovered transition states for each  
37 reaction was used for the kinetic simulations. The Rigid Rotor-Harmonic Oscillator (RRHO)  
38 approximation was used to estimate the free energies associated with all DFT calculations.

39 A detailed benchmarking of the model reaction approach for the alkane pyrolysis network is in  
40 Fig. S2a. For each model reaction, activation barriers of at least 40 corresponding actual reactions  
41 were calculated at the same level of theory. Note that MR48, MR52, MR54 and MR59 have no  
42 other mapped actual reactions but themselves, and hence were not benchmarked. Additionally, a  
43 comparison of the errors in exponential terms was made in Fig. S2a. The huge exponential factor  
44 variation for MR 40 is explained by the fact that the activation barrier of MR 40 is very small ( 3  
45 kcal/mol), which causes the rate constant variation to be relatively high even with a 1 kcal/mol  
46 change in activation barrier.

47 Because isomerization reactions are internal hydrogen abstraction reactions and the model re-  
48 action approach only conserves the first adjacent neighbors to reacting centers, the model reactions  
49  $\Delta G^\ddagger$  corresponding to isomerization do not contain the contribution of the ring-based transition  
50 state. To account for this, the differences between the simplest observed n-alkyl isomerizations  
51 and the corresponding H abstraction model reaction were used as correction factors for each iso-  
52 merization type (1-4, 1-5, 1-6, or 1-7). These correction factors were then subtracted from the  
53 corresponding H abstraction model reactions to obtain the  $\Delta G^\ddagger$  values of isomerization reactions  
54 in the network (Fig. Fig. S2b). Benchmarking of the isomerization correction factors is presented  
55 in Fig. S2c.

## 56 1.2 Kinetic modeling for half lives

57 With the ability to generate the pyrolysis reaction network and obtain the corresponding kinetic  
58 parameters of these reactions, Cantera<sup>11</sup> was used to solve the rate equations to obtain the half-life  
59 of each alkane starting with the pure alkane in an isothermal-isobaric (700 K, 1.01325 bar) ideal  
60 gas batch reactor.

61 The huge reaction networks pose a challenge due to the memory and processing power re-  
62 quired to solve these networks in Cantera. From the estimates of possible unique reactants or  
63 reactant pairs (for unimolecular and bimolecular reactions, respectively) for n-alkanes, the reac-  
64 tions networks grow at an exponential rate with increasing alkane length. These estimates are  
65 very conservative since the actual number of reactions will be much higher than the unique re-  
66 actants/reactant pairs since each reactant/reactant pair can lead to multiple reactions depending  
67 on the number of unique reaction sites in the reactants, and furthermore, the branched isomeric  
68 alkanes will have an even higher number of reaction channels compared to n-alkanes. The pruning  
69 (or reduction or condensation) of reaction mechanisms is a problem of great interest, and over  
70 the years a large number of numerical and analytical methods have been developed to tackle this  
71 challenge based on the complexity of the problem.<sup>12</sup>

72 A simple and robust method to prune reaction networks, especially when reaction rates are  
73 known, is to model the reaction kinetics and remove redundant reactions with extremely low rela-  
74 tive fluxes (or net rate of production) which are essentially not contributing to the overall kinetics  
75 but still consuming computational power. We used this method since it naturally integrated with  
76 our efforts to characterize reaction rate constants for all alkane pyrolysis reactions, and to obtain  
77 alkane pyrolysis half-lives from these rate constants and the reaction networks. However, as al-  
78 ready mentioned, given the super-exponential growth of reaction networks with increasing alkane  
79 length, pruning post network generation was not viable. So, we implemented a depth-wise kinetic

80 pruning strategy wherein at each reaction network generation depth calculated with respect to the  
81 starting alkane, the half-life of starting alkane was kinetically modeled (using the network gener-  
82 ated up to that depth) and reactions with low relative fluxes across all time steps were discarded  
83 before moving on to generating reactions for the next depth (Fig. 1a.iii). The threshold maximum  
84 relative flux to be used to prune reactions was obtained to be  $10^{-9}$  via trial-and-error comparison  
85 of alkane half-lives from the pruned networks to the half-lives obtained from full reaction networks  
86 for all isomers between  $C_2H_6$  and  $C_{10}H_{22}$ . That is, for the pruning step at each depth, all reactions  
87 with maximum relative fluxes over the simulation window of less than  $10^{-9}$  that of the highest flux  
88 reactions were discarded. The benchmarking of this kinetic pruning approach has been illustrated  
89 in the main text (Fig. 2b).

### 90 1.3 Predicting Stability

91 The kinetic simulations described in the previous sections resulted in a dataset of 32,421 alkanes  
92 and their corresponding half lives under pyrolysis conditions. A 90:10 train:test split was randomly  
93 generated for models training. To provide a more rigorous test of transferability, four other case-  
94 studies were performed using distinct training and testing splits, as already mentioned in section  
95 2.2 of the main text.

96 The stability score was developed as a relative metric to compare the thermal stability, based on  
97 the pyrolysis half-life data, of two or more alkanes. Rather than training the models to predict the  
98 half-lives directly, we hypothesized that a relative measure of stability might be more transferable  
99 and easier to learn. The Stability Score can be understood to be a log-scaled relative half-life of  
100 an alkane with the half-lives scaling exponentially with the Stability Score. Here, the stability  
101 score was learned by training the models to minimize a hinge loss function that penalizes incorrect  
102 predictions of the pair-wise relative stability of samples. Given a set of  $n$  alkanes:  $\{m_1, m_2, \dots, m_n\}$ ,  
103 and the corresponding log10 and z-normalized actual and model predicted half lives:  $\{t_1, t_2, \dots, t_n\}$

104 and  $\{\hat{t}_1, \hat{t}_2, \dots, \hat{t}_n\}$ , the hinge loss function is defined as

$$L = \sum_{i=1}^{n-1} \sum_{j=i+1}^n \max \left( 0, [(t_i - t_j) - (\hat{t}_i - \hat{t}_j)] \cdot \frac{t_i - t_j}{|t_i - t_j|} \right) \quad (3)$$

105 where the summations are over all unique pairs of samples in the training data. This loss function  
106 penalizes relative stability differences between species that are smaller than the log10 half-life  
107 difference in training data. This prevents overfitting by ensuring that if the predicted difference  
108 in stabilities is at least as much as the training data, the value inside the summation will be zero  
109 and will not affect the model parameter optimization.

110 A feed-forward MLP (Multi-Layer Perceptron) with 2048 length 8-bit integer folded Morgan  
111 fingerprints from RDKit as inputs, five hidden layers with 300 nodes each, with ReLU activation  
112 with bias, and a single linear output was implemented in python 3.10 with Tensorflow<sup>13</sup> 2.10.0 and  
113 Keras<sup>14</sup> (Fig. 1b). Due to the large variation in the alkane half-life values, the model was trained  
114 on the natural log and z-score normalized half-life values. Once trained, the model predictions were  
115 then wrapped in a sigmoid function and scaled from 0 to 100 for a more human readable format,  
116 and these scaled values were called the Stability Scores. The Adam optimizer with a constant  
117 learning rate of 0.001 was used for training. Training was stopped based on minimizing validation  
118 set performance. A batch size of 128 was used while training.

119 A Chemprop<sup>15</sup> model with alkane SMILES<sup>16</sup> and hinge loss was also trained for comparison.  
120 Both the MLP and Chemprop models were trained on all the split types.



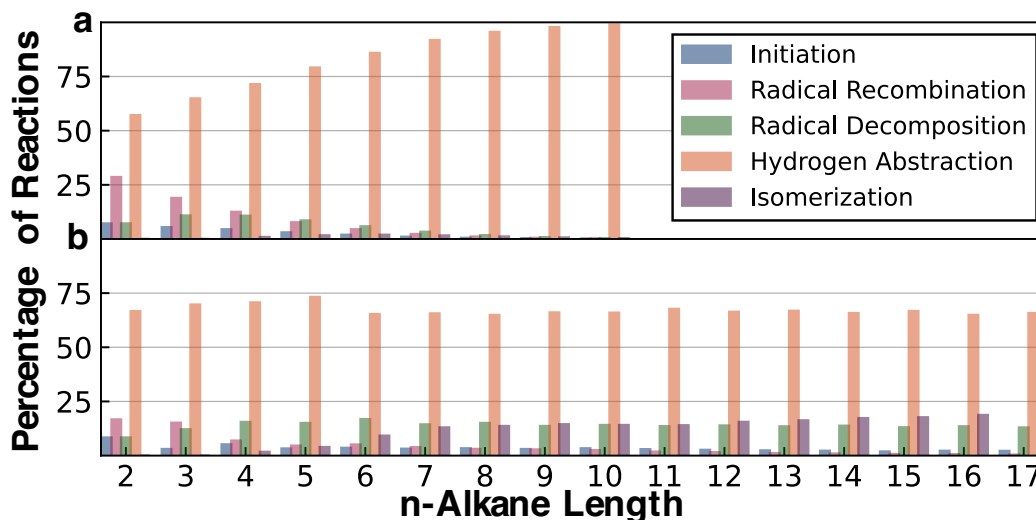

Figure S3: Comparing n-alkane reaction network ERS percentage composition (a) before and (b) after pruning.

## 121 2 Reaction networks ERS (Elementary Reaction Step) com- 122 position

123 Fig. S3 describes the percentage composition of the ERS (Elementary Reaction Steps) in some  
124 complete and pruned n-alkane reaction networks illustrating the domination of H-abstraction re-  
125 actions.

## 126 3 Experimental Kinetic Data

127 Table S1 lists all the experimental reactions and rate parameters used.<sup>17</sup> Table S2 shows the  
128 reactions which were used from Table S1 for the corresponding reaction schemes.

Table S1: All Reactions and Kinetic Parameters

| No. | Reaction                                                                                                              | A<br>(s <sup>-1</sup> or L mol <sup>-1</sup> s <sup>-1</sup> ) | E <sub>a</sub><br>(kcal/mol) |
|-----|-----------------------------------------------------------------------------------------------------------------------|----------------------------------------------------------------|------------------------------|
| 1.  | $\text{C}_2\text{H}_6 \longrightarrow 2 \text{CH}_3\cdot$                                                             | $4.0 \times 10^{16}$                                           | 87.5                         |
| 2.  | $\text{C}_2\text{H}_6 + \text{H}\cdot \longrightarrow \text{C}_2\text{H}_5\cdot + \text{H}_2$                         | $1.0 \times 10^{11}$                                           | 9.7                          |
| 3.  | $\text{C}_2\text{H}_6 + \text{CH}_3\cdot \longrightarrow \text{C}_2\text{H}_5\cdot + \text{CH}_4$                     | $3.8 \times 10^{11}$                                           | 16.5                         |
| 4.  | $\text{C}_2\text{H}_5\cdot \longrightarrow \text{C}_2\text{H}_4 + \text{H}\cdot$                                      | $3.2 \times 10^{13}$                                           | 40.0                         |
| 5.  | $\text{C}_2\text{H}_5 + \text{H}\cdot \longrightarrow \text{C}_2\text{H}_6$                                           | $4.0 \times 10^{10}$                                           | 0                            |
| 6.  | $2 \text{CH}_3\cdot \longrightarrow \text{C}_2\text{H}_6$                                                             | $1.3 \times 10^{10}$                                           | 0                            |
| 7.  | $\text{C}_3\text{H}_8 \longrightarrow \text{C}_2\text{H}_5\cdot + \text{CH}_3\cdot$                                   | $2.0 \times 10^{16}$                                           | 84.5                         |
| 8.  | $\text{C}_3\text{H}_8 + \text{H}\cdot \longrightarrow 1\text{-C}_3\text{H}_7\cdot + \text{H}_2$                       | $1.0 \times 10^{11}$                                           | 9.7                          |
| 9.  | $\text{C}_3\text{H}_8 + \text{H}\cdot \longrightarrow 2\text{-C}_3\text{H}_7\cdot + \text{H}_2$                       | $9.0 \times 10^{10}$                                           | 8.3                          |
| 10. | $\text{C}_3\text{H}_8 + \text{CH}_3\cdot \longrightarrow 1\text{-C}_3\text{H}_7\cdot + \text{CH}_4$                   | $3.4 \times 10^{10}$                                           | 11.5                         |
| 11. | $\text{C}_3\text{H}_8 + \text{CH}_3\cdot \longrightarrow 2\text{-C}_3\text{H}_7\cdot + \text{CH}_4$                   | $4.0 \times 10^9$                                              | 10.1                         |
| 12. | $\text{C}_3\text{H}_8 + \text{C}_2\text{H}_5\cdot \longrightarrow 1\text{-C}_3\text{H}_7\cdot + \text{C}_2\text{H}_6$ | $1.2 \times 10^9$                                              | 12.6                         |
| 13. | $\text{C}_3\text{H}_8 + \text{C}_2\text{H}_5\cdot \longrightarrow 2\text{-C}_3\text{H}_7\cdot + \text{C}_2\text{H}_6$ | $8.0 \times 10^8$                                              | 10.4                         |
| 14. | $1\text{-C}_3\text{H}_7\cdot \longrightarrow \text{C}_2\text{H}_4 + \text{CH}_3\cdot$                                 | $4.0 \times 10^{13}$                                           | 32.6                         |
| 15. | $1\text{-C}_3\text{H}_7\cdot \longrightarrow \text{C}_3\text{H}_6 + \text{H}\cdot$                                    | $2.0 \times 10^{13}$                                           | 38.4                         |
| 16. | $2\text{-C}_3\text{H}_7\cdot \longrightarrow \text{C}_3\text{H}_6 + \text{H}\cdot$                                    | $2.0 \times 10^{13}$                                           | 38.7                         |
| 17. | $1\text{-C}_3\text{H}_7\cdot + \text{H}\cdot \longrightarrow \text{C}_3\text{H}_8$                                    | $1.0 \times 10^{10}$                                           | 0                            |
| 18. | $2\text{-C}_3\text{H}_7\cdot + \text{H}\cdot \longrightarrow \text{C}_3\text{H}_8$                                    | $1.0 \times 10^{10}$                                           | 0                            |
| 19. | $\text{C}_2\text{H}_5\cdot + \text{CH}_3\cdot \longrightarrow \text{C}_3\text{H}_8$                                   | $3.2 \times 10^9$                                              | 0                            |

Continued on next page

Table S1 – continued from previous page

| No. | Reaction                                                                                                                                 | A<br>(s <sup>-1</sup> or L mol <sup>-1</sup> s <sup>-1</sup> ) | E <sub>a</sub><br>(kcal/mol) |
|-----|------------------------------------------------------------------------------------------------------------------------------------------|----------------------------------------------------------------|------------------------------|
| 20. | n-C <sub>4</sub> H <sub>10</sub> → 2 C <sub>2</sub> H <sub>5</sub> ·                                                                     | 1.5 × 10 <sup>16</sup>                                         | 82.1                         |
| 21. | n-C <sub>4</sub> H <sub>10</sub> → 1-C <sub>3</sub> H <sub>7</sub> · + CH <sub>3</sub> ·                                                 | 9.0 × 10 <sup>16</sup>                                         | 85.4                         |
| 22. | i-C <sub>4</sub> H <sub>10</sub> → 2-C <sub>3</sub> H <sub>7</sub> · + CH <sub>3</sub> ·                                                 | 2.0 × 10 <sup>16</sup>                                         | 82.0                         |
| 23. | n-C <sub>4</sub> H <sub>10</sub> + H· → 1-C <sub>4</sub> H <sub>9</sub> · + H <sub>2</sub>                                               | 1.5 × 10 <sup>11</sup>                                         | 9.7                          |
| 24. | n-C <sub>4</sub> H <sub>10</sub> + H· → 2-C <sub>4</sub> H <sub>9</sub> · + H <sub>2</sub>                                               | 9.0 × 10 <sup>10</sup>                                         | 8.4                          |
| 25. | i-C <sub>4</sub> H <sub>10</sub> + H· → i-C <sub>4</sub> H <sub>9</sub> · + H <sub>2</sub>                                               | 1.0 × 10 <sup>11</sup>                                         | 8.4                          |
| 26. | n-C <sub>4</sub> H <sub>10</sub> + CH <sub>3</sub> · → 1-C <sub>4</sub> H <sub>9</sub> · + CH <sub>4</sub>                               | 3.5 × 10 <sup>10</sup>                                         | 11.6                         |
| 27. | n-C <sub>4</sub> H <sub>10</sub> + CH <sub>3</sub> · → 2-C <sub>4</sub> H <sub>9</sub> · + CH <sub>4</sub>                               | 3.5 × 10 <sup>9</sup>                                          | 9.5                          |
| 28. | i-C <sub>4</sub> H <sub>10</sub> + CH <sub>3</sub> · → i-C <sub>4</sub> H <sub>9</sub> · + CH <sub>4</sub>                               | 9.5 × 10 <sup>9</sup>                                          | 9.0                          |
| 29. | n-C <sub>4</sub> H <sub>10</sub> + C <sub>2</sub> H <sub>5</sub> · → 1-C <sub>4</sub> H <sub>9</sub> · + C <sub>2</sub> H <sub>6</sub>   | 2.0 × 10 <sup>9</sup>                                          | 12.6                         |
| 30. | n-C <sub>4</sub> H <sub>10</sub> + C <sub>2</sub> H <sub>5</sub> · → 2-C <sub>4</sub> H <sub>9</sub> · + C <sub>2</sub> H <sub>6</sub>   | 4.5 × 10 <sup>8</sup>                                          | 10.4                         |
| 31. | i-C <sub>4</sub> H <sub>10</sub> + C <sub>2</sub> H <sub>5</sub> · → i-C <sub>4</sub> H <sub>9</sub> · + C <sub>2</sub> H <sub>6</sub>   | 1.5 × 10 <sup>9</sup>                                          | 10.4                         |
| 32. | n-C <sub>4</sub> H <sub>10</sub> + 1-C <sub>3</sub> H <sub>7</sub> · → 2-C <sub>4</sub> H <sub>9</sub> · + C <sub>3</sub> H <sub>8</sub> | 2.0 × 10 <sup>8</sup>                                          | 10.4                         |
| 33. | n-C <sub>4</sub> H <sub>10</sub> + 2-C <sub>3</sub> H <sub>7</sub> · → 2-C <sub>4</sub> H <sub>9</sub> · + C <sub>3</sub> H <sub>8</sub> | 2.0 × 10 <sup>8</sup>                                          | 12.6                         |
| 34. | i-C <sub>4</sub> H <sub>10</sub> + 2-C <sub>3</sub> H <sub>7</sub> · → i-C <sub>4</sub> H <sub>9</sub> · + C <sub>3</sub> H <sub>8</sub> | 1.0 × 10 <sup>8</sup>                                          | 13.4                         |
| 35. | 1-C <sub>4</sub> H <sub>9</sub> · → C <sub>2</sub> H <sub>4</sub> + C <sub>2</sub> H <sub>5</sub> ·                                      | 1.6 × 10 <sup>12</sup>                                         | 28.0                         |
| 36. | 1-C <sub>4</sub> H <sub>9</sub> · → 1-C <sub>4</sub> H <sub>8</sub> + H·                                                                 | 1.0 × 10 <sup>13</sup>                                         | 36.6                         |
| 37. | 2-C <sub>4</sub> H <sub>9</sub> · → 1-C <sub>4</sub> H <sub>8</sub> + H·                                                                 | 2.0 × 10 <sup>13</sup>                                         | 39.8                         |
| 38. | i-C <sub>4</sub> H <sub>9</sub> · → i-C <sub>4</sub> H <sub>8</sub> + H·                                                                 | 3.3 × 10 <sup>14</sup>                                         | 36.0                         |
| 39. | 2-C <sub>4</sub> H <sub>9</sub> · → C <sub>3</sub> H <sub>6</sub> + CH <sub>3</sub> ·                                                    | 2.5 × 10 <sup>13</sup>                                         | 31.9                         |
| 40. | i-C <sub>4</sub> H <sub>9</sub> · → C <sub>3</sub> H <sub>6</sub> + CH <sub>3</sub> ·                                                    | 8.0 × 10 <sup>13</sup>                                         | 33.0                         |

Continued on next page

Table S1 – continued from previous page

| No. | Reaction                                                                                             | A<br>(s <sup>-1</sup> or L mol <sup>-1</sup> s <sup>-1</sup> ) | E <sub>a</sub><br>(kcal/mol) |
|-----|------------------------------------------------------------------------------------------------------|----------------------------------------------------------------|------------------------------|
| 41. | i-C <sub>4</sub> H <sub>9</sub> · → 2-C <sub>4</sub> H <sub>8</sub> + H·                             | 4.0 × 10 <sup>13</sup>                                         | 36.6                         |
| 42. | 1-C <sub>4</sub> H <sub>9</sub> · + H· → n-C <sub>4</sub> H <sub>10</sub>                            | 1.0 × 10 <sup>10</sup>                                         | 0                            |
| 43. | 2-C <sub>4</sub> H <sub>9</sub> · + H· → n-C <sub>4</sub> H <sub>10</sub>                            | 1.0 × 10 <sup>10</sup>                                         | 0                            |
| 44. | i-C <sub>4</sub> H <sub>9</sub> · + H· → i-C <sub>4</sub> H <sub>10</sub>                            | 1.0 × 10 <sup>10</sup>                                         | 0                            |
| 45. | 1-C <sub>3</sub> H <sub>7</sub> · + CH <sub>3</sub> · → n-C <sub>4</sub> H <sub>10</sub>             | 3.2 × 10 <sup>9</sup>                                          | 0                            |
| 46. | C <sub>2</sub> H <sub>5</sub> · + C <sub>2</sub> H <sub>5</sub> · → n-C <sub>4</sub> H <sub>10</sub> | 3.2 × 10 <sup>9</sup>                                          | 0                            |

Table S2: Alkane Pyrolysis Schemes

| Alkane     | Reactions Considered |
|------------|----------------------|
| Ethane     | 1-6                  |
| Propane    | 1-19                 |
| n-Butane   | 1-46                 |
| iso-Butane | 1-46                 |

## 129 4 Models Training Details

130 The learning curves for all split types for the MLP model are shown in Fig. S4 and for the  
131 Chemprop model are shown in Fig. S5. 10% of each training split was withheld as validation  
132 data for determining stopping for training. The Best Validation model was used for testing. It  
133 can be observed that across all splits and models, the training and validation losses drop quickly  
134 within the first 20 epochs and the majority of the training happens within the first 100 epochs  
135 with another 200 epochs being required for fine tuning. Also, it is important to note that the  
136 loss values for MLP and Chemprop cannot be directly compared because of the different default

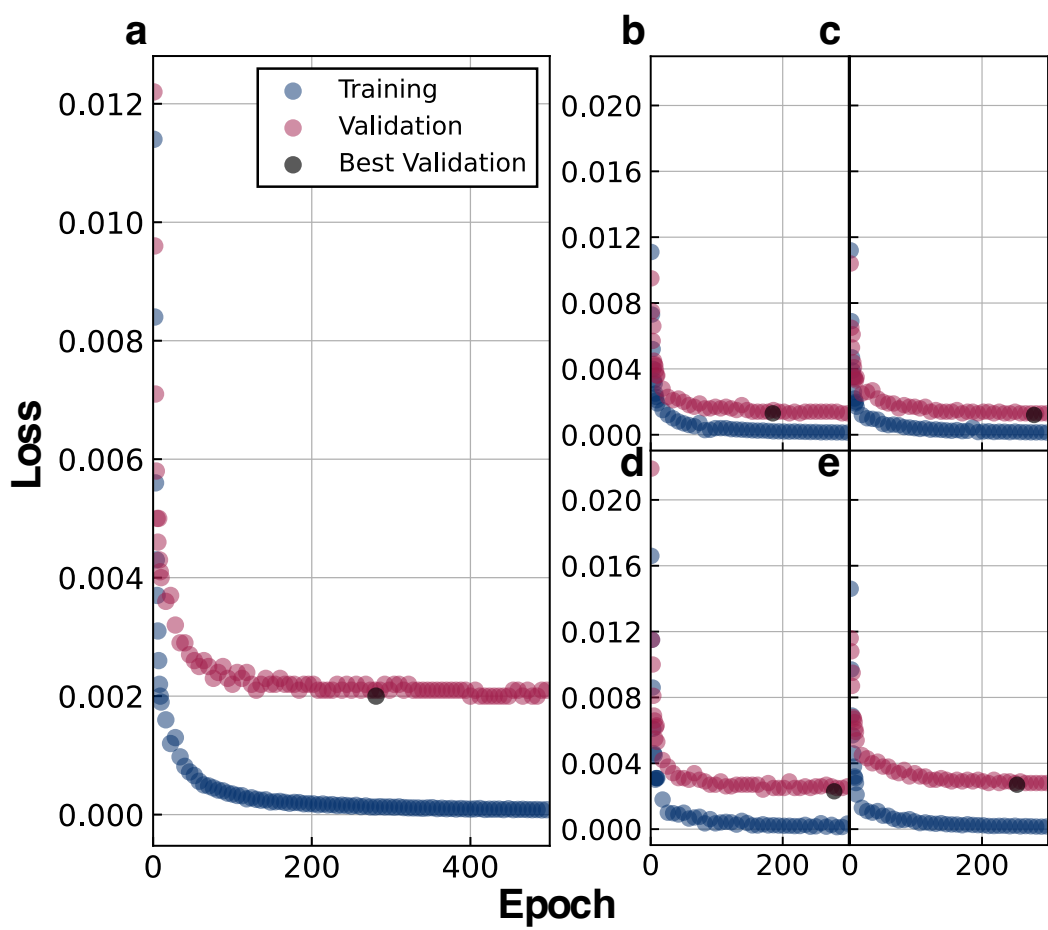

Figure S4: MLP learning curves (a) Random Split. (b) Total Branches  $\leq 6$ . (c) Core Branches  $\leq 4$ . (d) Backbone  $\leq 10$ . (e) Length  $\leq 16$ .

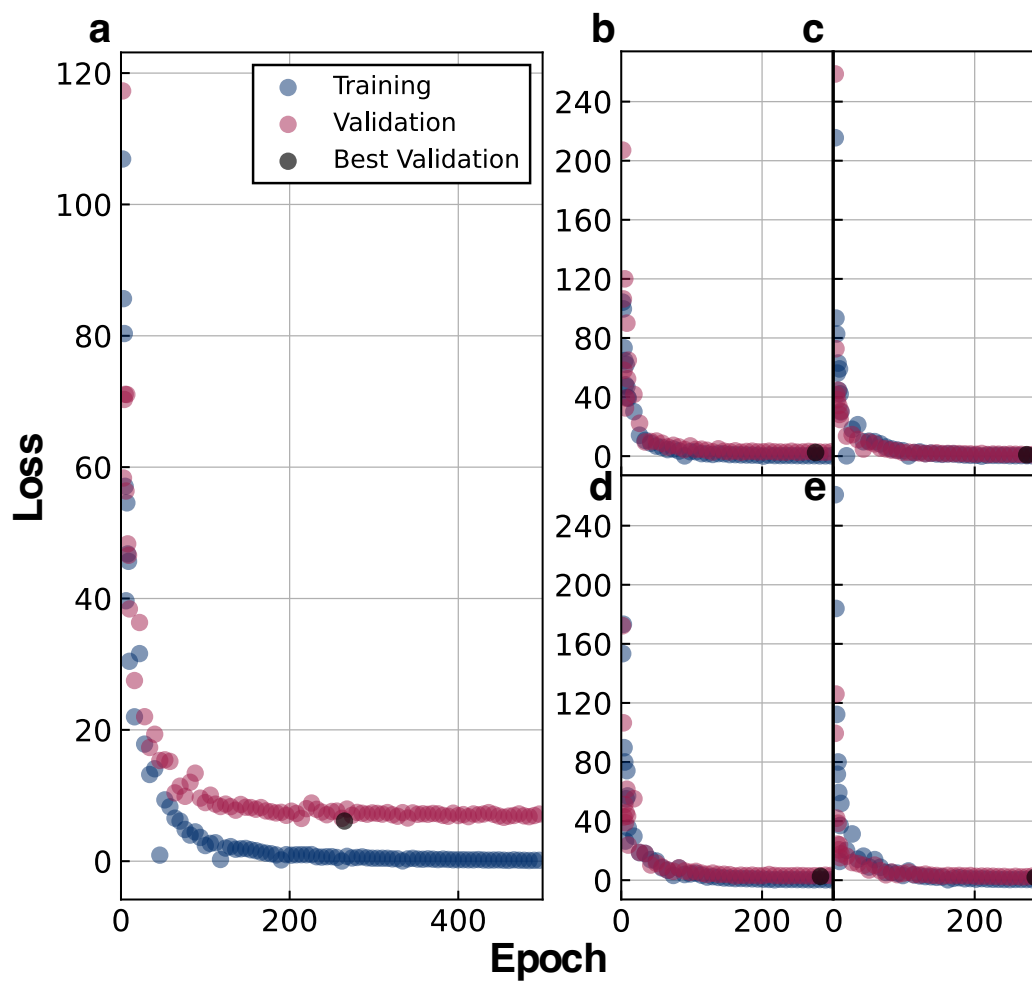

Figure S5: Chemprop learning curves (a) Random Split. (b) Total Branches  $\leq 6$ . (c) Core Branches  $\leq 4$ . (d) Backbone  $\leq 10$ . (e) Length  $\leq 16$ .

137 initialization.

## 138 References

- 139 (1) Gao, C. W.; Allen, J. W.; Green, W. H.; West, R. H. Reaction Mechanism Generator: Au-  
140 tomatic Construction of Chemical Kinetic Mechanisms. *Computer Physics Communications*  
141 **2016**, *203*, 212–225, DOI: 10.1016/j.cpc.2016.02.013.
- 142 (2) Liu, M.; Grinberg Dana, A.; Johnson, M. S.; Goldman, M. J.; Jocher, A.; Payne, A. M.; Gram-  
143 bow, C. A.; Han, K.; Yee, N. W.; Mazeau, E. J.; Blondal, K.; West, R. H.; Goldsmith, C. F.;  
144 Green, W. H. Reaction Mechanism Generator v3.0: Advances in Automatic Mechanism Gen-  
145 eration. *J. Chem. Inf. Model.* **2021**, *61*, 2686–2696, DOI: 10.1021/acs.jcim.0c01480.
- 146 (3) Eyring, H. The Activated Complex in Chemical Reactions. *J. Chem. Phys.* **1935**, *3*, 107–115,  
147 DOI: 10.1063/1.1749604.
- 148 (4) Wigner, E. On the Quantum Correction For Thermodynamic Equilibrium. *Phys. Rev.* **1932**,  
149 *40*, 749–759, DOI: 10.1103/PhysRev.40.749.
- 150 (5) St. John, P. C.; Guan, Y.; Kim, Y.; Kim, S.; Paton, R. S. Prediction of Organic Homolytic  
151 Bond Dissociation Enthalpies at near Chemical Accuracy with Sub-Second Computational  
152 Cost. *Nat Commun* **2020**, *11*, 2328, DOI: 10.1038/s41467-020-16201-z.
- 153 (6) Zhao, Q.; Savoie, B. M. Algorithmic Explorations of Unimolecular and Bi-  
154 molecular Reaction Spaces. *Angew. Chem., Int. Ed.* *n/a*, e202210693, DOI:  
155 <https://doi.org/10.1002/anie.202210693>.
- 156 (7) Zimmerman, P. M. Growing string method with interpolation and optimization in internal  
157 coordinates: Method and examples. *J. Chem. Phys.* **2013**, *138*, 184102.
- 158 (8) Zhao, Q.; Hsu, H.-H.; Savoie, B. M. Conformational Sampling for Transition State Searches  
159 on a Computational Budget. *J. Chem. Theory Comput.* **2022**, *18*, 3006–3016.



- 160 (9) Chai, J.-D.; Head-Gordon, M. Long-Range Corrected Hybrid Density Functionals with  
161 Damped Atom–Atom Dispersion Corrections. *Phys. Chem. Chem. Phys.* **2008**, *10*, 6615–  
162 6620, DOI: 10.1039/B810189B.
- 163 (10) Weigend, F.; Ahlrichs, R. Balanced Basis Sets of Split Valence, Triple Zeta Valence and  
164 Quadruple Zeta Valence Quality for H to Rn: Design and Assessment of Accuracy. *Phys.*  
165 *Chem. Chem. Phys.* **2005**, *7*, 3297–3305, DOI: 10.1039/B508541A.
- 166 (11) Goodwin, D. G.; Moffat, H. K.; Schoegl, I.; Speth, R. L.; Weber, B. W. Cantera: An Object-  
167 oriented Software Toolkit for Chemical Kinetics, Thermodynamics, and Transport Processes.  
168 <https://www.cantera.org>, 2022; Version 2.6.0.
- 169 (12) Turányi, T.; Tomlin, A. S. In *Analysis of Kinetic Reaction Mechanisms*; Turányi, T.,  
170 Tomlin, A. S., Eds.; Springer: Berlin, Heidelberg, 2014; pp 183–312, DOI:  
171 10.1007/978-3-662-44562-4\_7.
- 172 (13) Abadi, M. et al. TensorFlow: Large-Scale Machine Learning on Heterogeneous Systems. 2015;  
173 <https://www.tensorflow.org/>, Software available from tensorflow.org.
- 174 (14) Chollet, F., et al. Keras. <https://keras.io>, 2015.
- 175 (15) Yang, K.; Swanson, K.; Jin, W.; Coley, C.; Eiden, P.; Gao, H.; Guzman-Perez, A.; Hopper, T.;  
176 Kelley, B.; Mathea, M.; Palmer, A.; Settels, V.; Jaakkola, T.; Jensen, K.; Barzilay, R. Analyz-  
177 ing Learned Molecular Representations for Property Prediction. *J. Chem. Inf. Model.* **2019**,  
178 *59*, 3370–3388, DOI: 10.1021/acs.jcim.9b00237.
- 179 (16) Weininger, D. SMILES, a Chemical Language and Information System. 1. Introduction  
180 to Methodology and Encoding Rules. *J. Chem. Inf. Comput. Sci.* **1988**, *28*, 31–36, DOI:  
181 10.1021/ci00057a005.

182 (17) Sundaram, K. M.; Froment, G. F. Modeling of Thermal Cracking Kinetics. 3. Radical Mech-  
183 anisms for the Pyrolysis of Simple Paraffins, Olefins, and Their Mixtures. *Ind. Eng. Chem.*  
184 *Fund.* **1978**, *17*, 174–182, DOI: 10.1021/i160067a006.
